# Supplementary material for: Regulatory cocktail for dopaminergic neurons in a protovertebrate identified by whole-embryo single-cell transcriptomics
Source: PubMed Central journal article supplement — Genes Dev. 2018 Oct 1;32(19-20):1297–302. doi: 10.1101/gad.317669.118 (PMC6169837; doi:10.1101/gad.317669.118), 2018-10-01

**A**  
Dopamine pathway genes

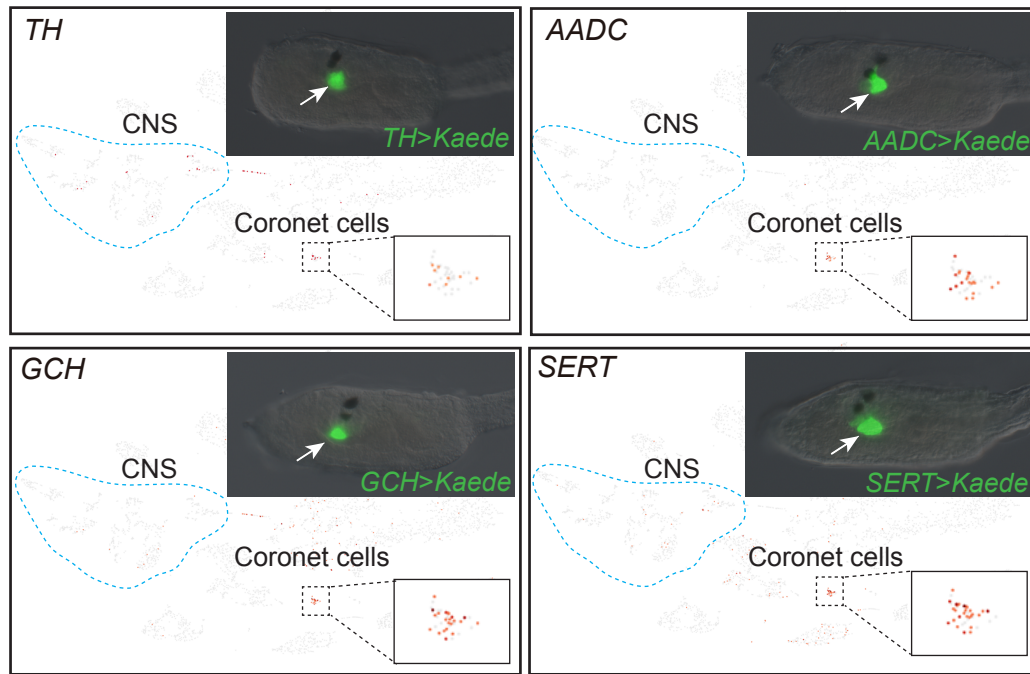

**B**  
Hormone/Neuropeptide/Neuropeptide receptor

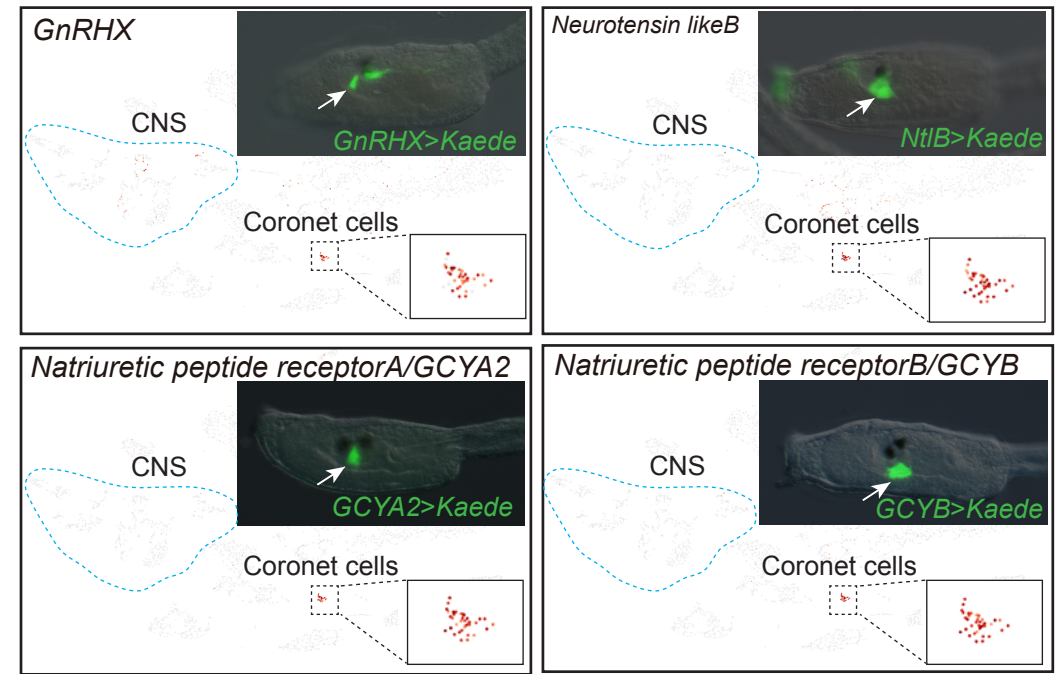

**C**  
cGMA pathway genes

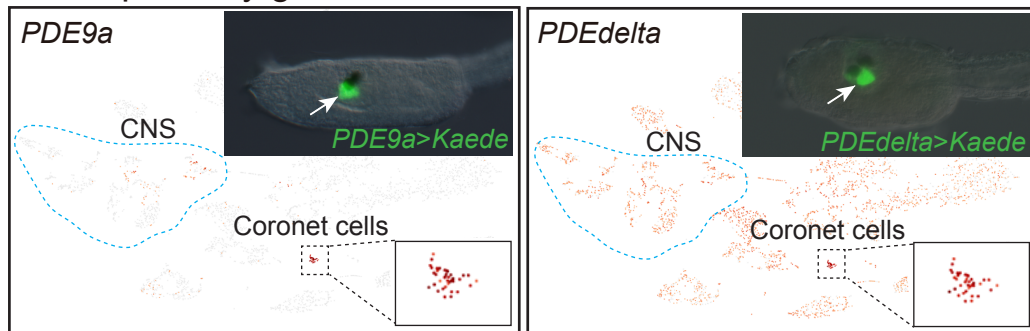

**D**  
Others

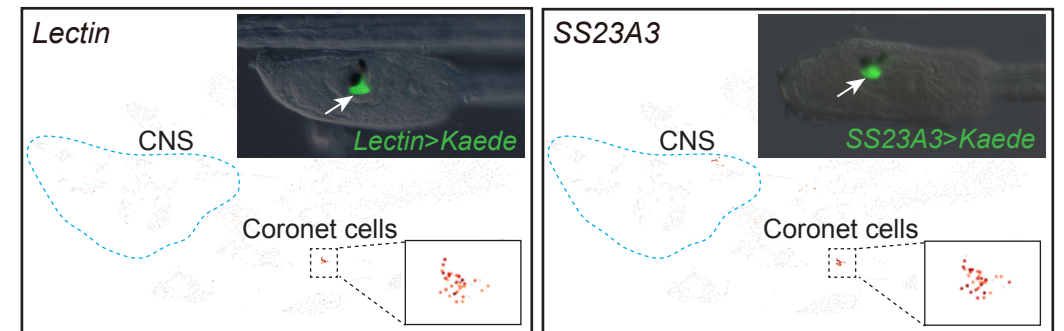

Supplement: supp_gad.317669.118_Supplemental_Fig_S2.pdf [file supp_gad.317669.118_Supplemental_Fig_S2.pdf]
