# Supplementary material for: Regulatory cocktail for dopaminergic neurons in a protovertebrate identified by whole-embryo single-cell transcriptomics
Source: PubMed Central journal article supplement — Genes Dev. 2018 Oct 1;32(19-20):1297–302. doi: 10.1101/gad.317669.118 (PMC6169837; doi:10.1101/gad.317669.118), 2018-10-01

A

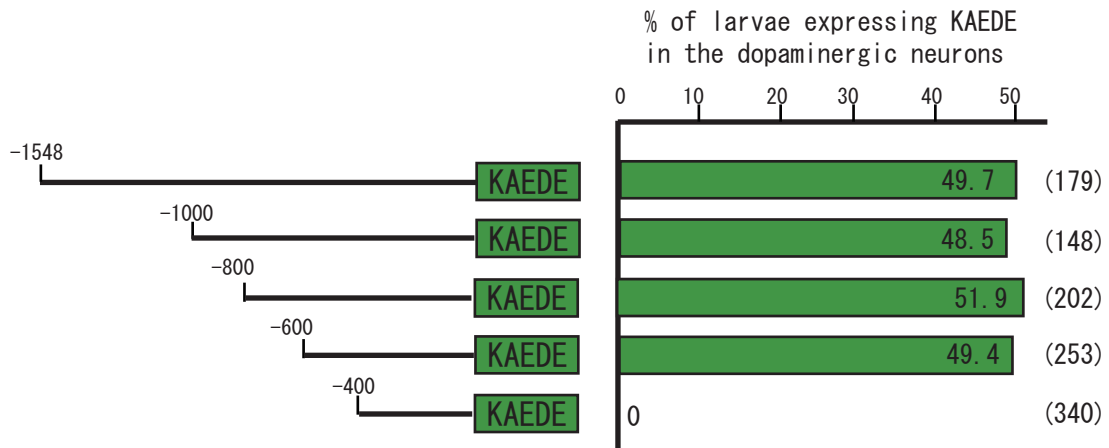

B

-668  
 TGCAAGGGATGTATATTTATAGTAAATAACAGAACTGCCAACTGGCGTTTATTTATTGT  
 CAGTTGACACGACCATCAAACACTTTTGTATAATGCAGTTATAATTTGTAGCACTACGT  
 Meis  
 AATACGTACCGTGATTGCGTTGTTATTGCACAGCAGTAAGAGACAGCAGTGACGTAAAT  
 GAAAACAAAACGCGTCACGCGCAGATGGTAGATGTACACCTGATATTGGAGAAATAGCGG  
 E-box1 E-box2  
 TAGTCAGTCCAGCAGTGCTTGTATAACACATGGGGTGACGTCTTGTTCATTTAATCTA  
 E-box3  
 -369

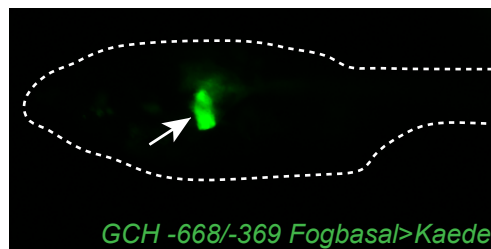

C

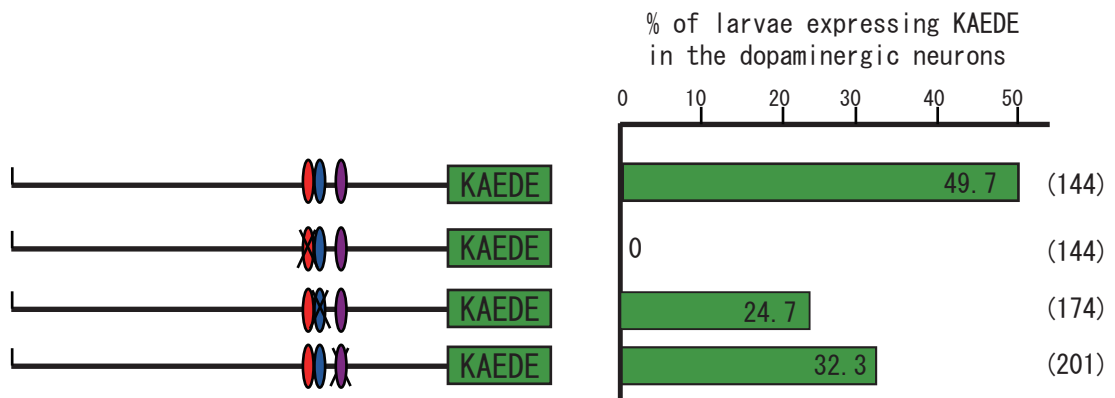

Supplement: supp_gad.317669.118_Supplemental_Fig_S14.pdf [file supp_gad.317669.118_Supplemental_Fig_S14.pdf]
