# Supplementary material for: Regulatory cocktail for dopaminergic neurons in a protovertebrate identified by whole-embryo single-cell transcriptomics
Source: PubMed Central journal article supplement — Genes Dev. 2018 Oct 1;32(19-20):1297–302. doi: 10.1101/gad.317669.118 (PMC6169837; doi:10.1101/gad.317669.118), 2018-10-01

A

-500  
 GTACATAATATCCAAACATTCTGAACGTTTTTAAACAATTAACAACGGTCTATAAGAGTC  
 GTGAAGAGATACCGTTTTATATTTCTTTGAATGTTCTTTGTTTATCACCAAATGGGACGA  
 GAAAACGGAATGAACAGGTGTCCTCGTCTCCCCCACCTACTATATATTAATACTACTCCA  
 TACACCTCTTGCCAGTTTACGAATTACCAATATGTTACTTTGCGGTTGTTTTTTGCAT  
 CTTTCATTTTTTATGTATGACTGATAATTTGGTCAACCCATTAGTGGCCGCTGAATTGGT  
 TCGCACAAAGCGTCTGTGTTTGACGTTTATTGCTGTTGCAAACATGTGTTATATTGTGGCT  
 TGAGTTGAAATGTCTTGTCAATCGCAGGCGTCCAATAAACCGAATATCATTAAAAGCCAA  
 TATATAATAAGACCGGACCTGCCGGTTCATTTTTATTGTGCCAAAATATTTTAGCCGCA  
 ATATAATCCATTACCGCAAT<sup>-1</sup>

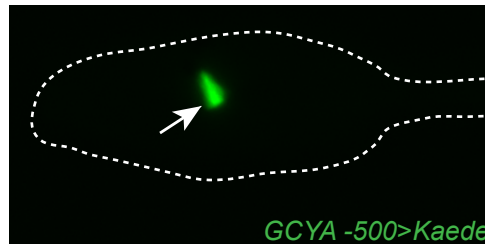

B

-500  
 GGAAAAAGCTGGTTTATATAACATTTTTCGTTATGTCGATAACTTTATAC  
 ACATACCGCTATATTGATTATAAATGGTTTGGTCTTTAATGGTCATTTGA  
 TAAAACAAACATAATACATGTCAAATGCAGAGAAAATGCATTTGATTT  
 GCGTTACGTTTGTAGTGTCTGCATATGACAAGCGCACACTGATAATAAA<sup>-301</sup>  
 E-box Meis

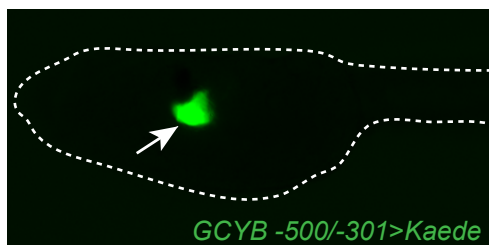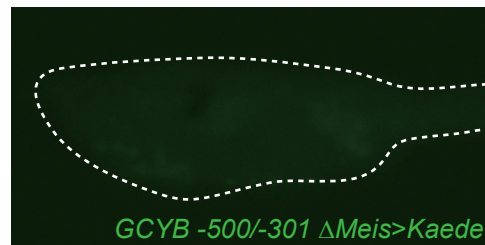

Supplement: supp_gad.317669.118_Supplemental_Fig_S15.pdf [file supp_gad.317669.118_Supplemental_Fig_S15.pdf]
