# Supplementary figures and images for: Regulatory cocktail for dopaminergic neurons in a protovertebrate identified by whole-embryo single-cell transcriptomics
Source: PubMed Central journal article supplement — Genes Dev. 2018 Oct 1;32(19-20):1297–302. doi: 10.1101/gad.317669.118 (PMC6169837; doi:10.1101/gad.317669.118), 2018-10-01

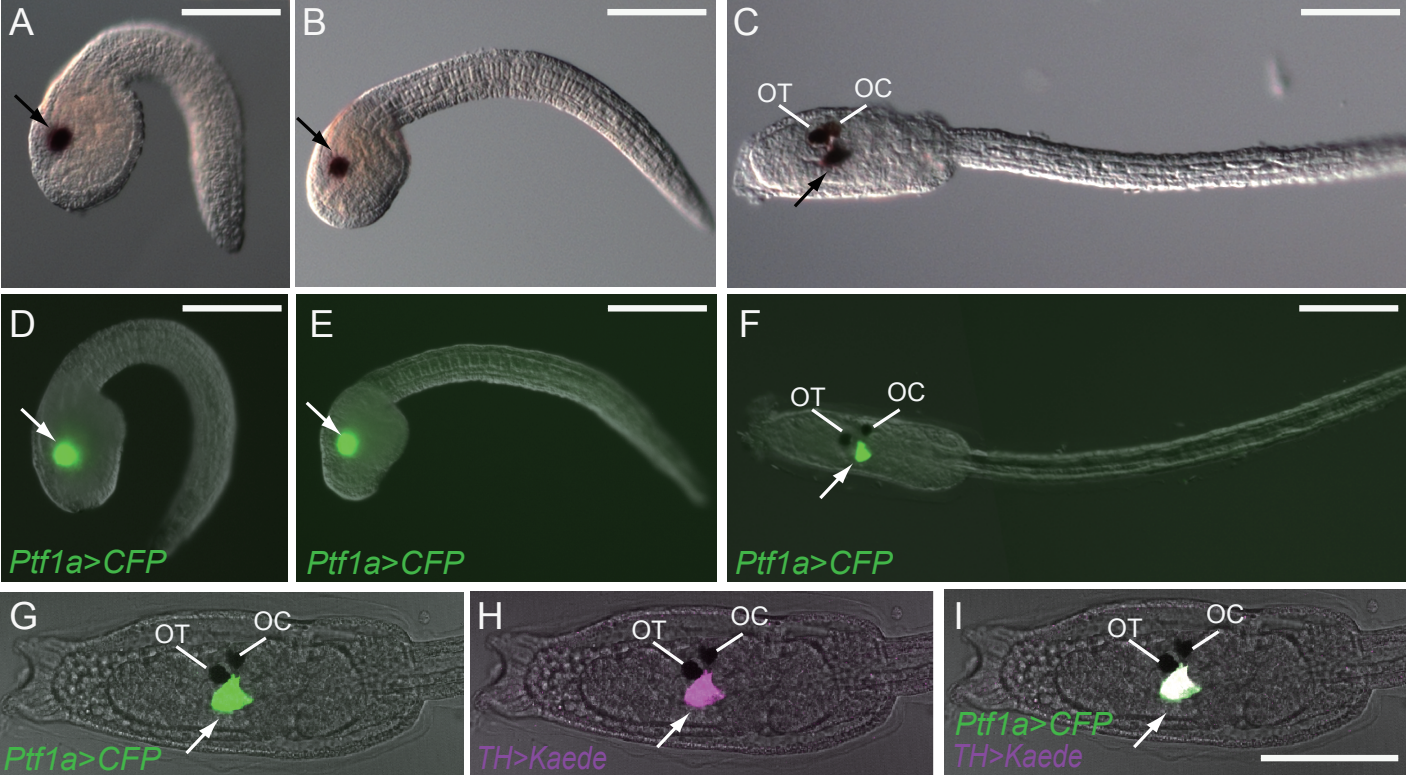

Supplement: supp_gad.317669.118_Supplemental_Fig_S1.pdf [file supp_gad.317669.118_Supplemental_Fig_S1.pdf]

A

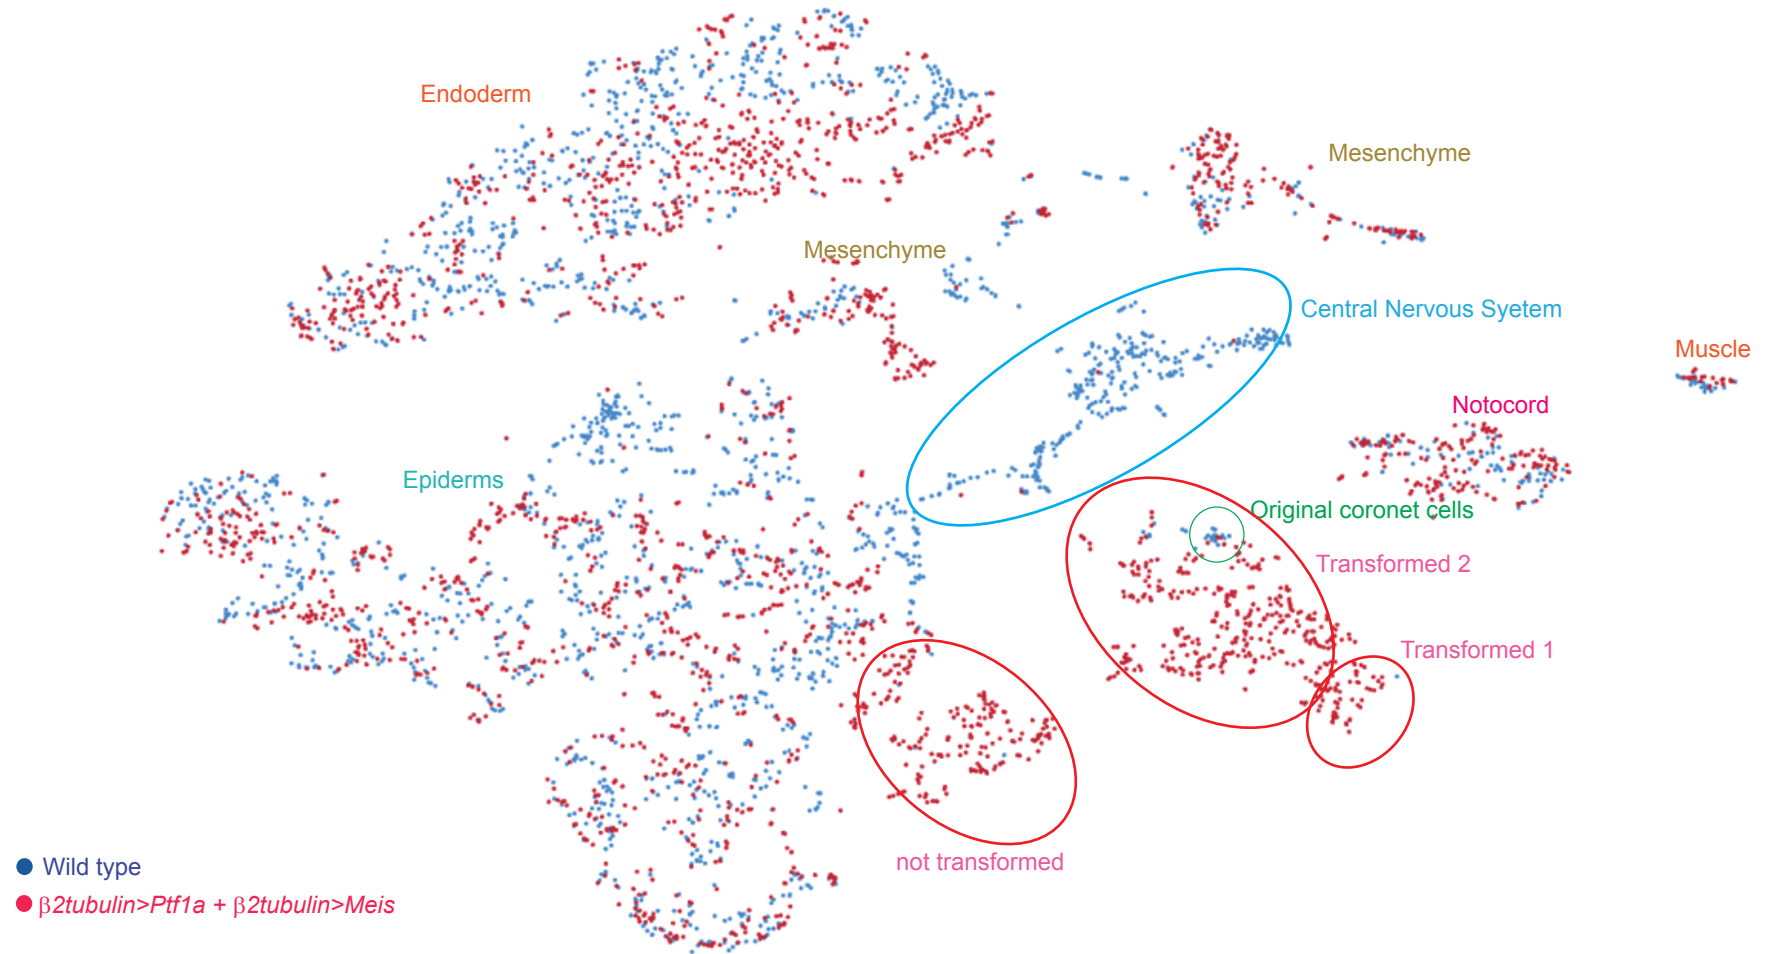

Supplement: supp_gad.317669.118_Supplemental_Fig_S10.pdf [file supp_gad.317669.118_Supplemental_Fig_S10.pdf]

A

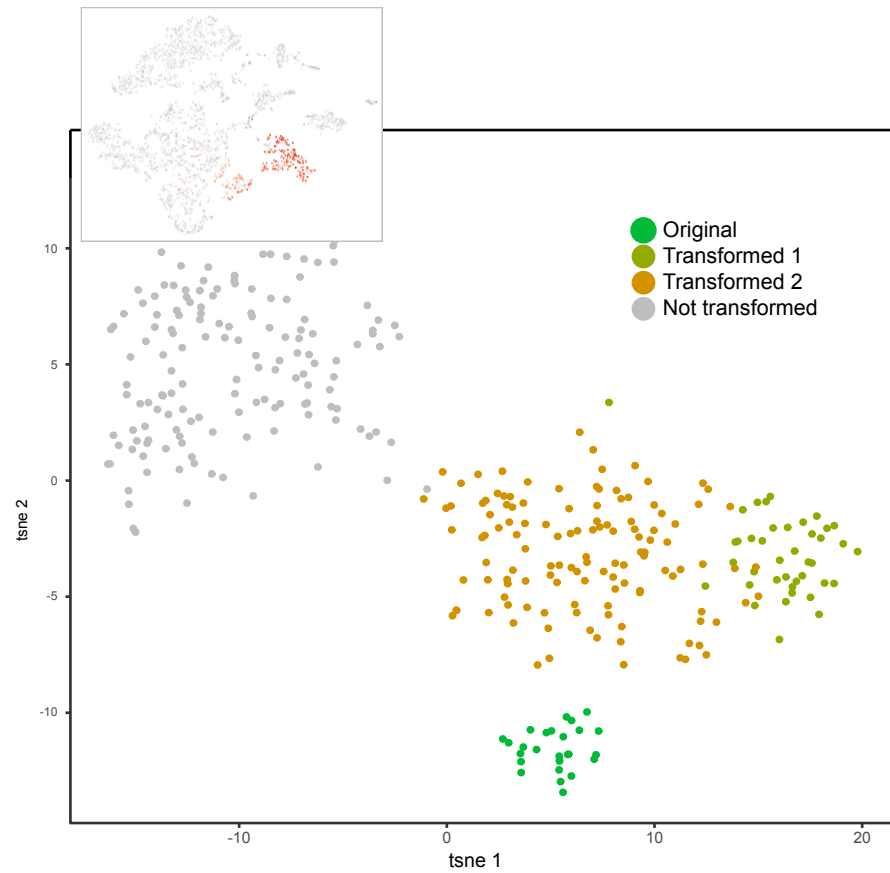

B

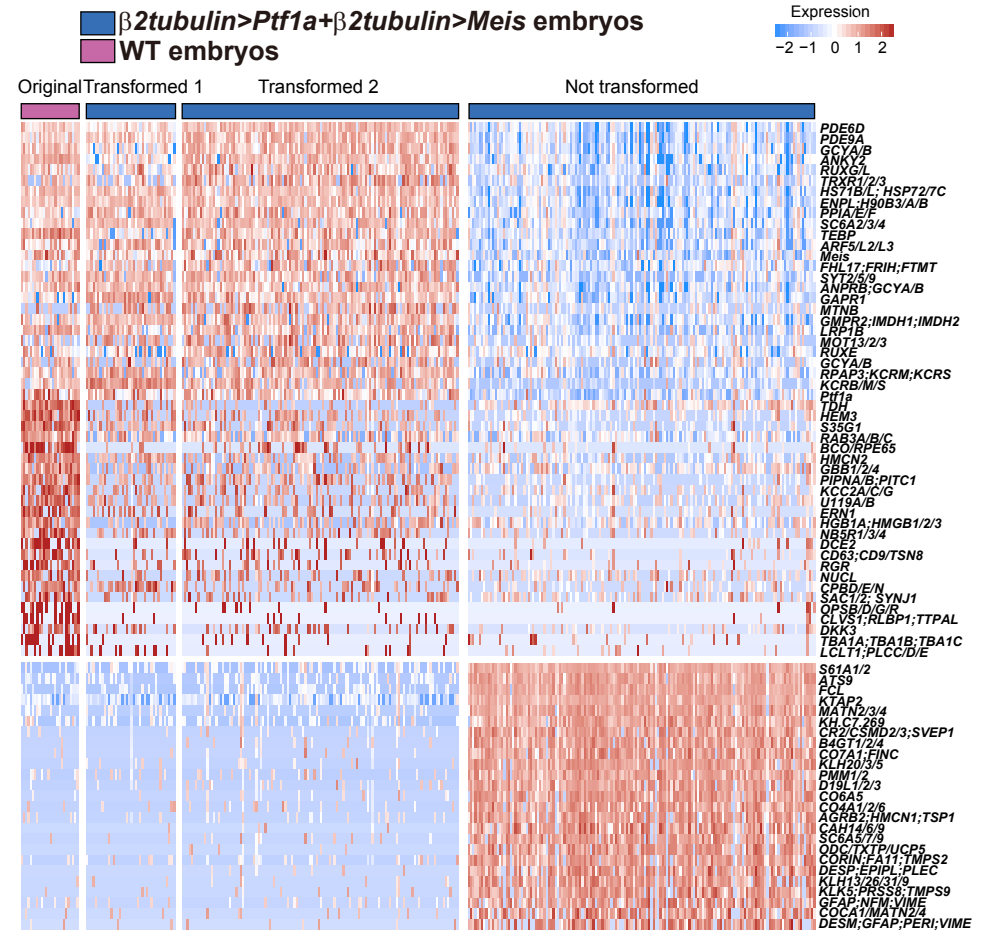

Supplement: supp_gad.317669.118_Supplemental_Fig_S11.pdf [file supp_gad.317669.118_Supplemental_Fig_S11.pdf]

Horie \_Supplemental Figure S12

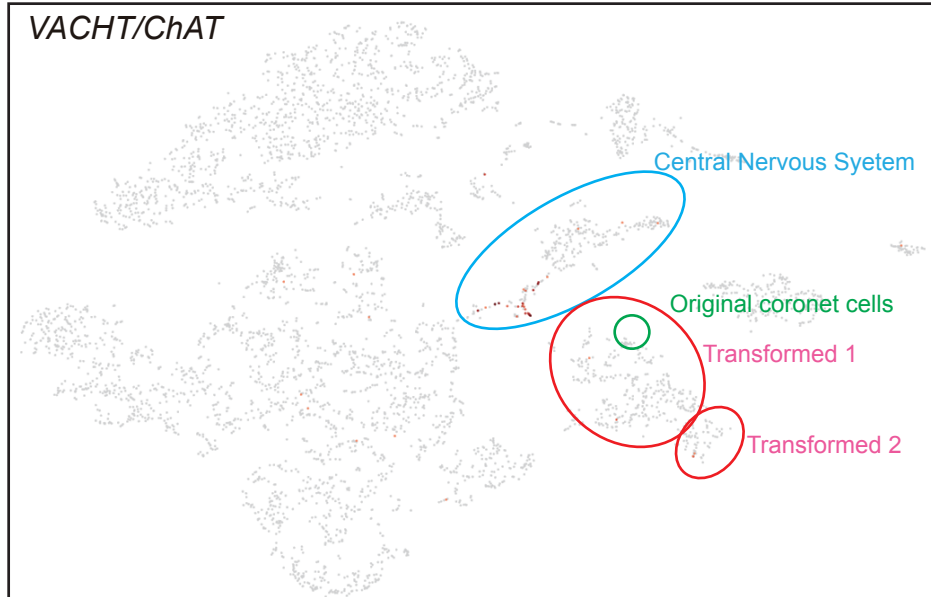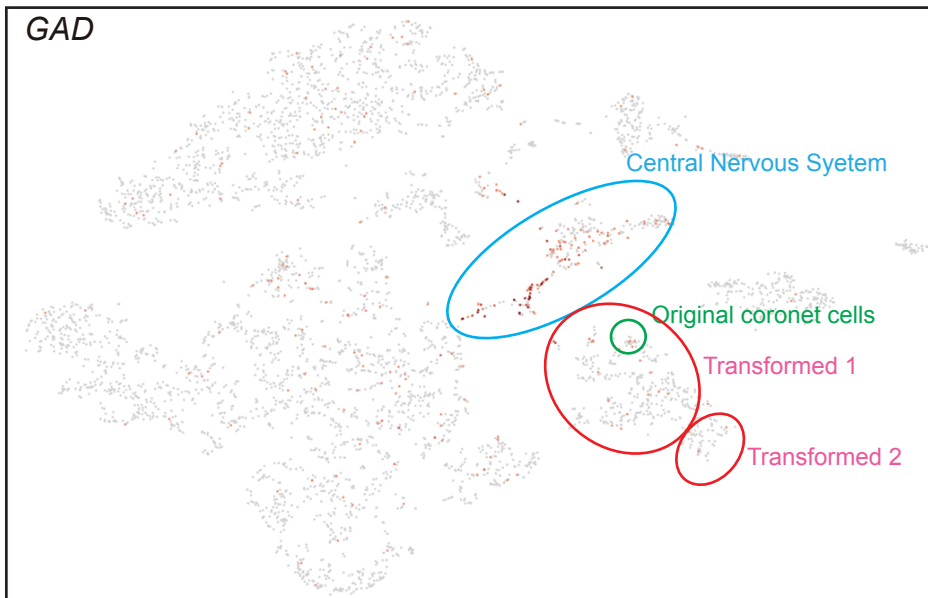

Supplement: supp_gad.317669.118_Supplemental_Fig_S12.pdf [file supp_gad.317669.118_Supplemental_Fig_S12.pdf]

A

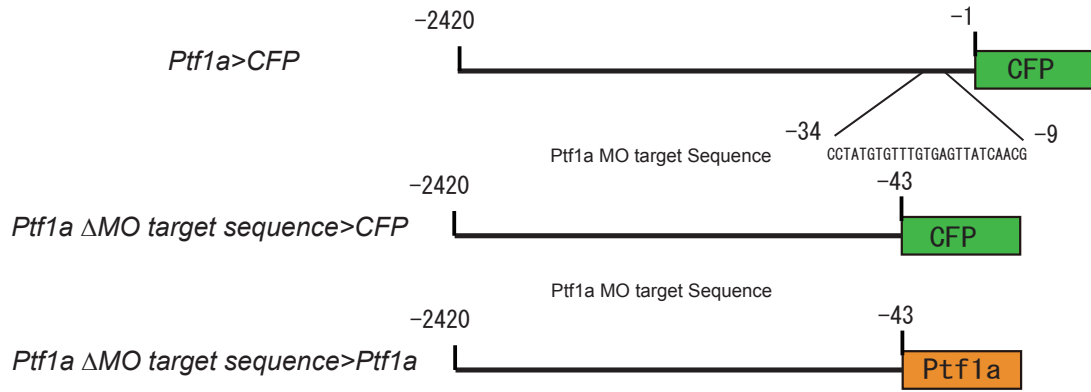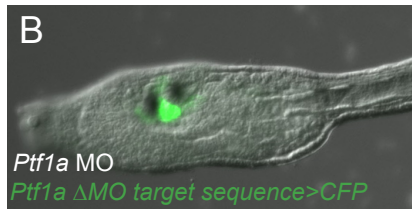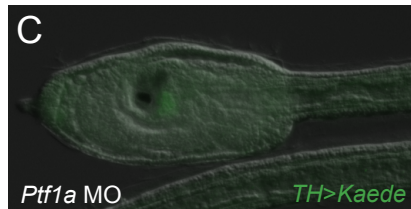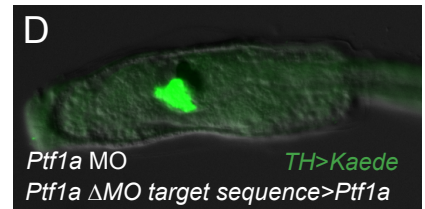

Supplement: supp_gad.317669.118_Supplemental_Fig_S3.pdf [file supp_gad.317669.118_Supplemental_Fig_S3.pdf]

Horie \_Supplemental Figure S4

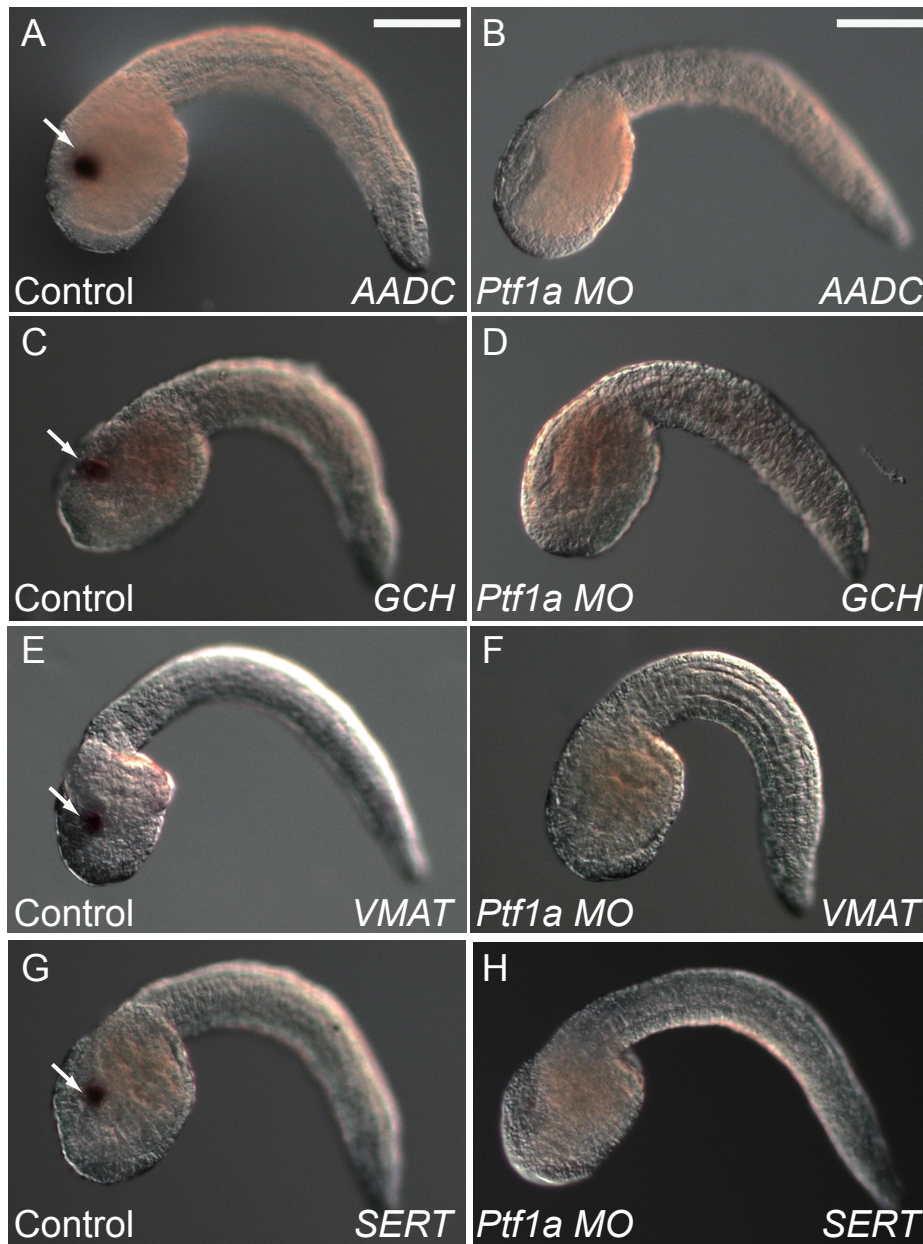

Supplement: supp_gad.317669.118_Supplemental_Fig_S4.pdf [file supp_gad.317669.118_Supplemental_Fig_S4.pdf]

Horie \_Supplemental Figure S5

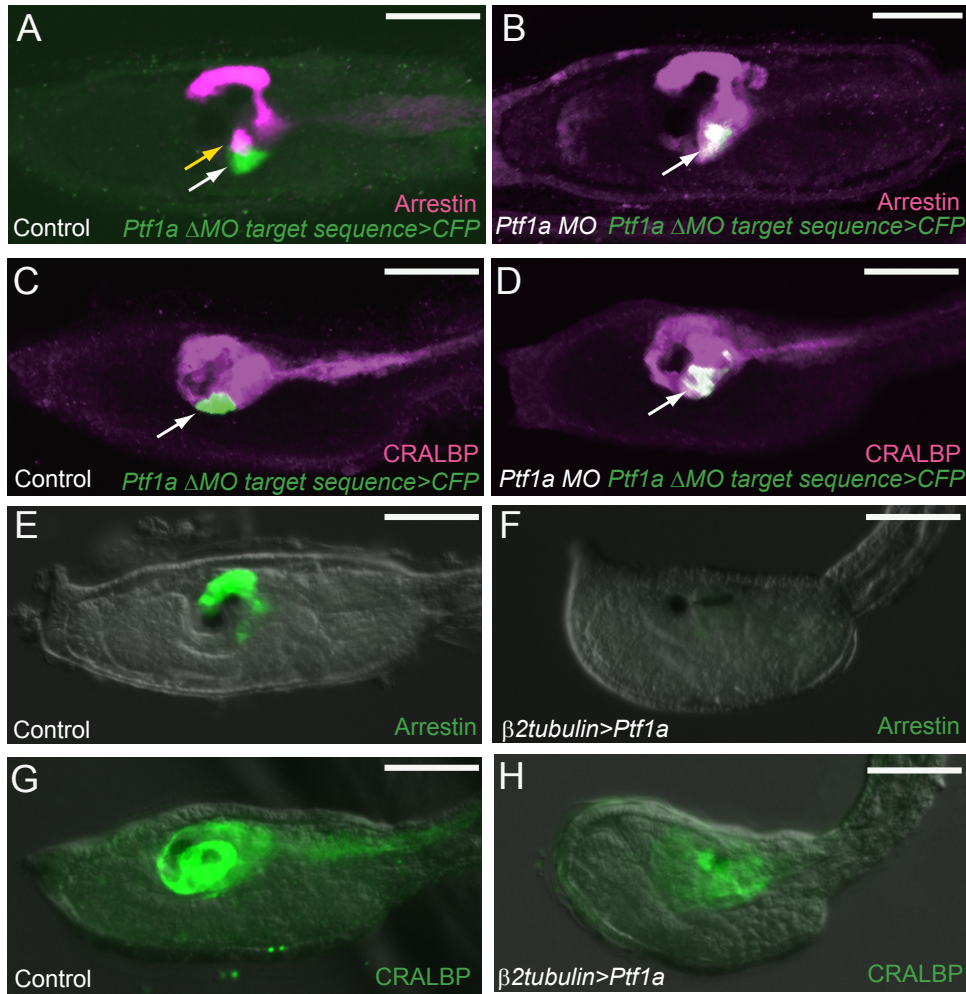

Supplement: supp_gad.317669.118_Supplemental_Fig_S5.pdf [file supp_gad.317669.118_Supplemental_Fig_S5.pdf]

A

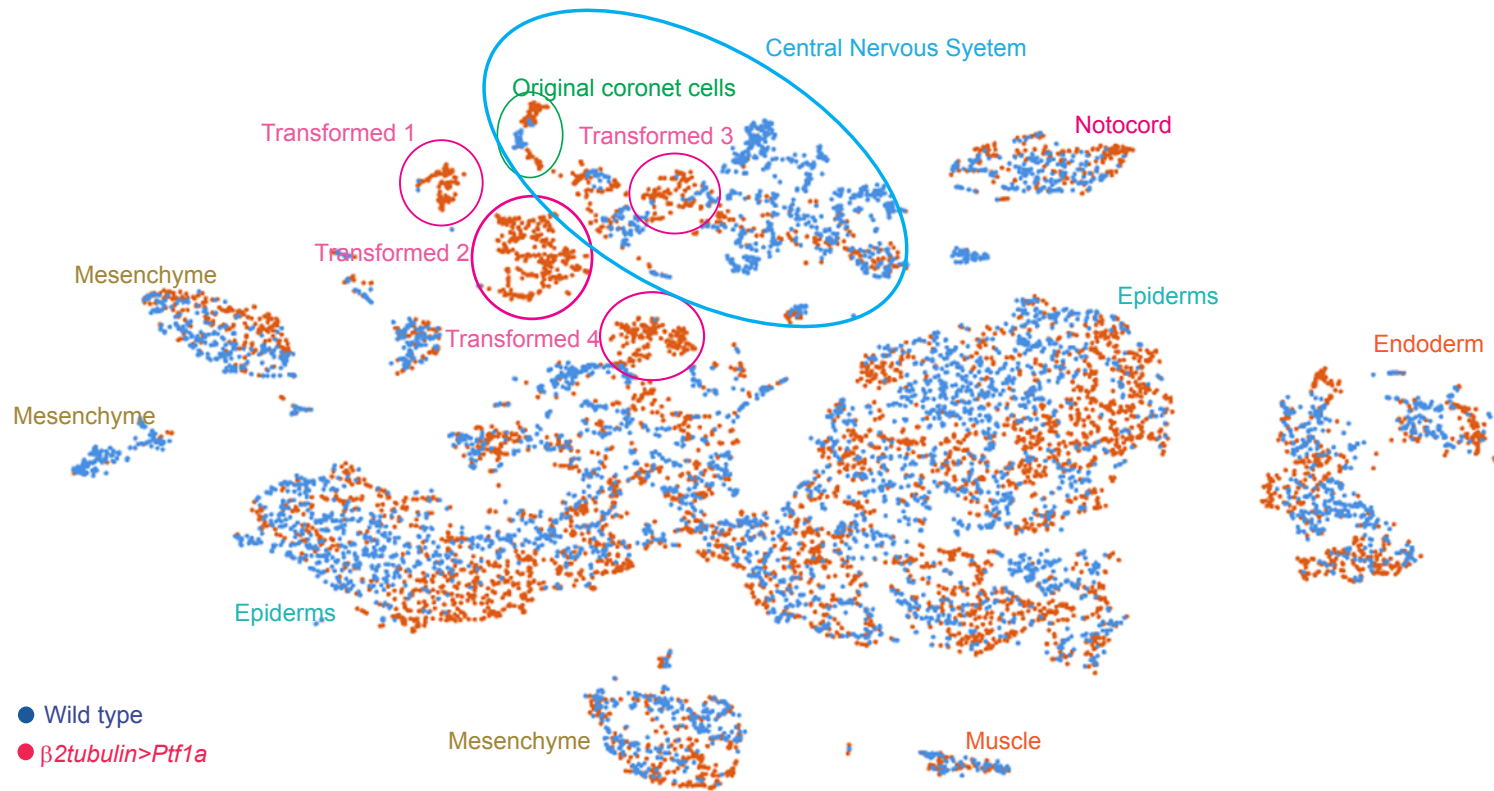

B

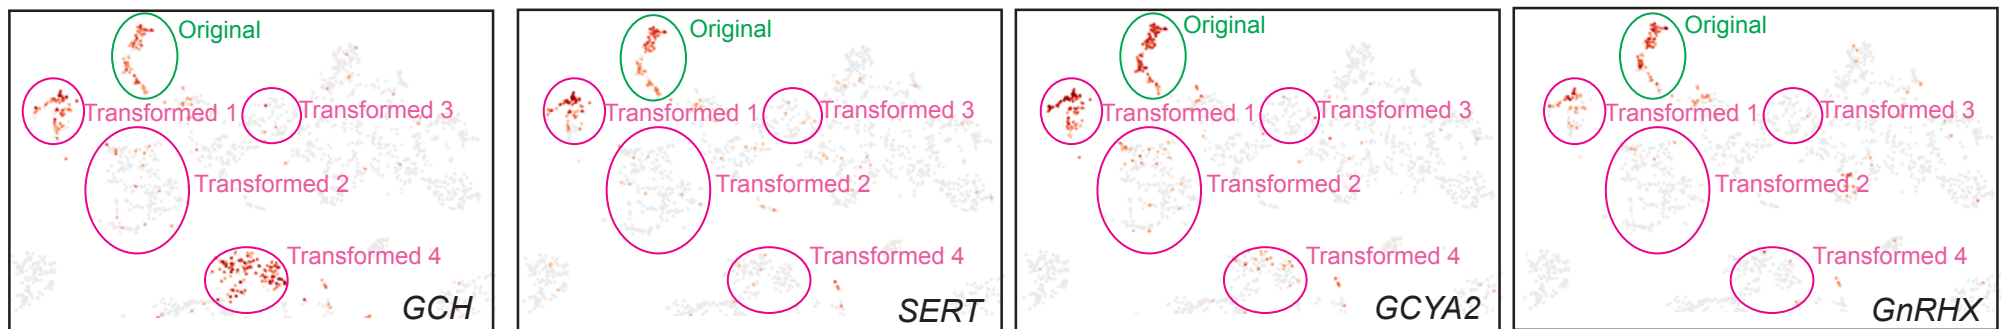

Supplement: supp_gad.317669.118_Supplemental_Fig_S6.pdf [file supp_gad.317669.118_Supplemental_Fig_S6.pdf]

Horie\_Supplemental Figure S7

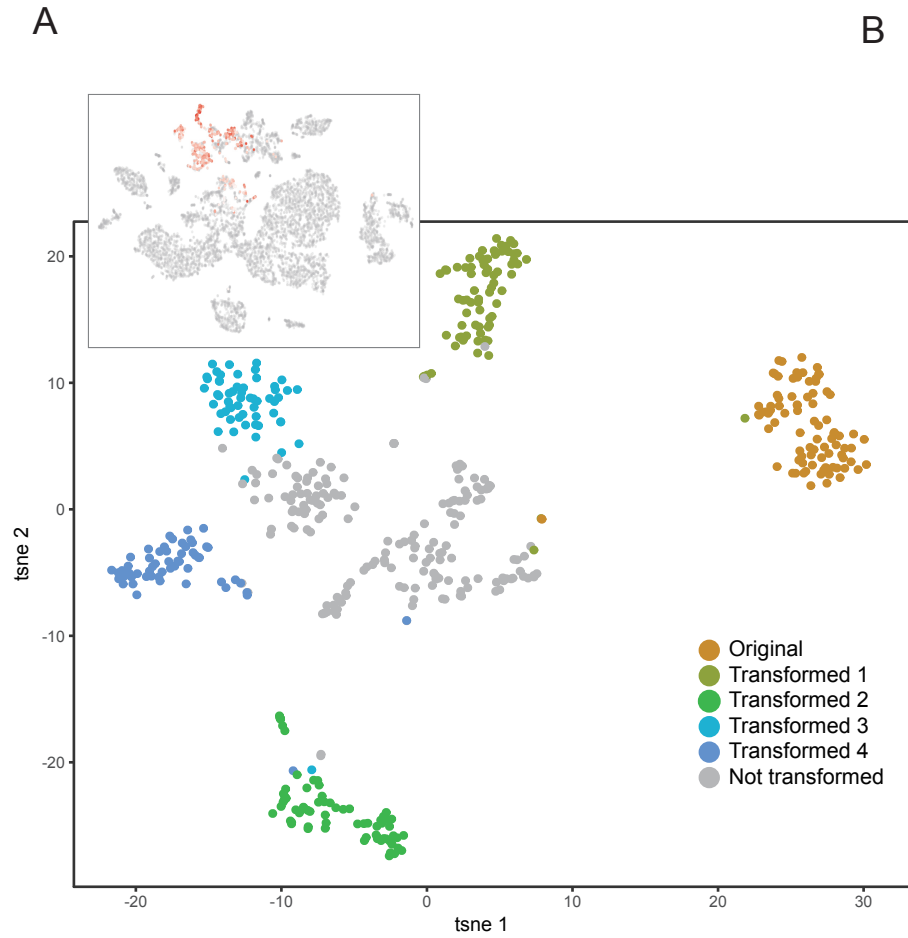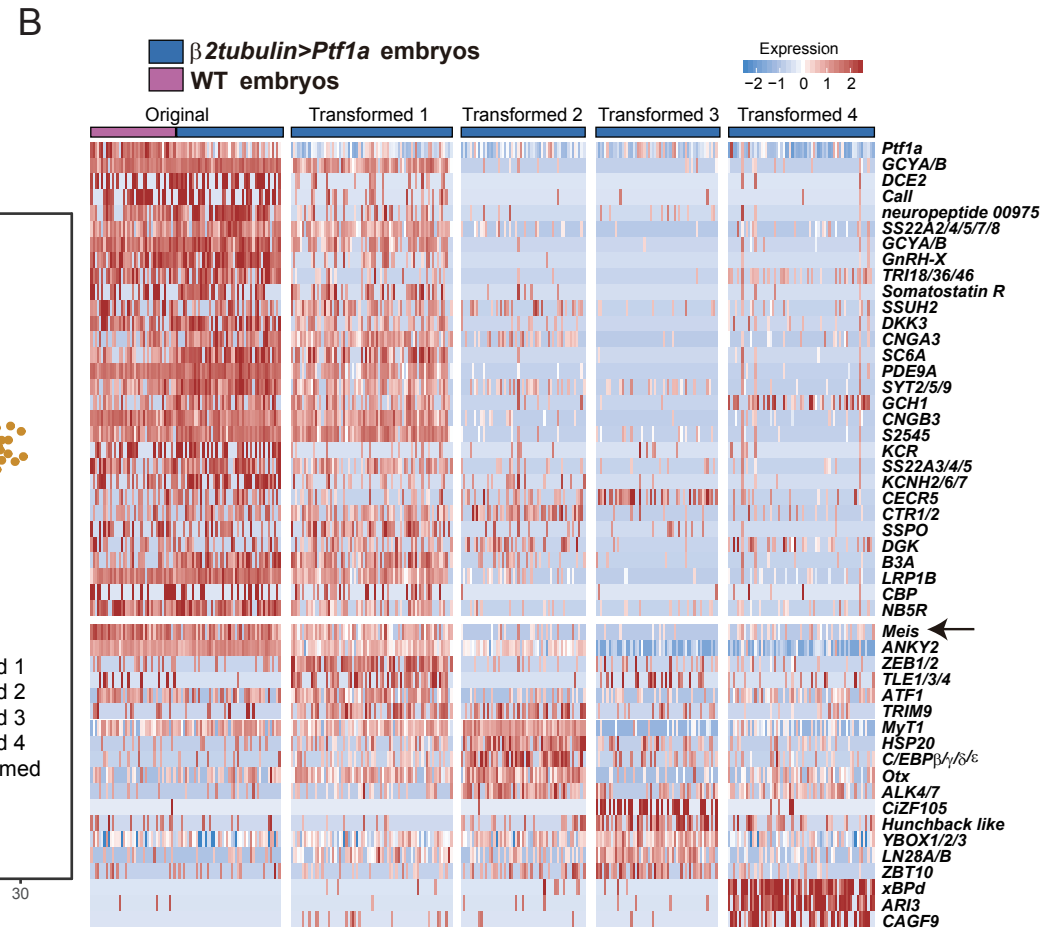

Supplement: supp_gad.317669.118_Supplemental_Fig_S7.pdf [file supp_gad.317669.118_Supplemental_Fig_S7.pdf]

Horie \_Supplemental Figure S8

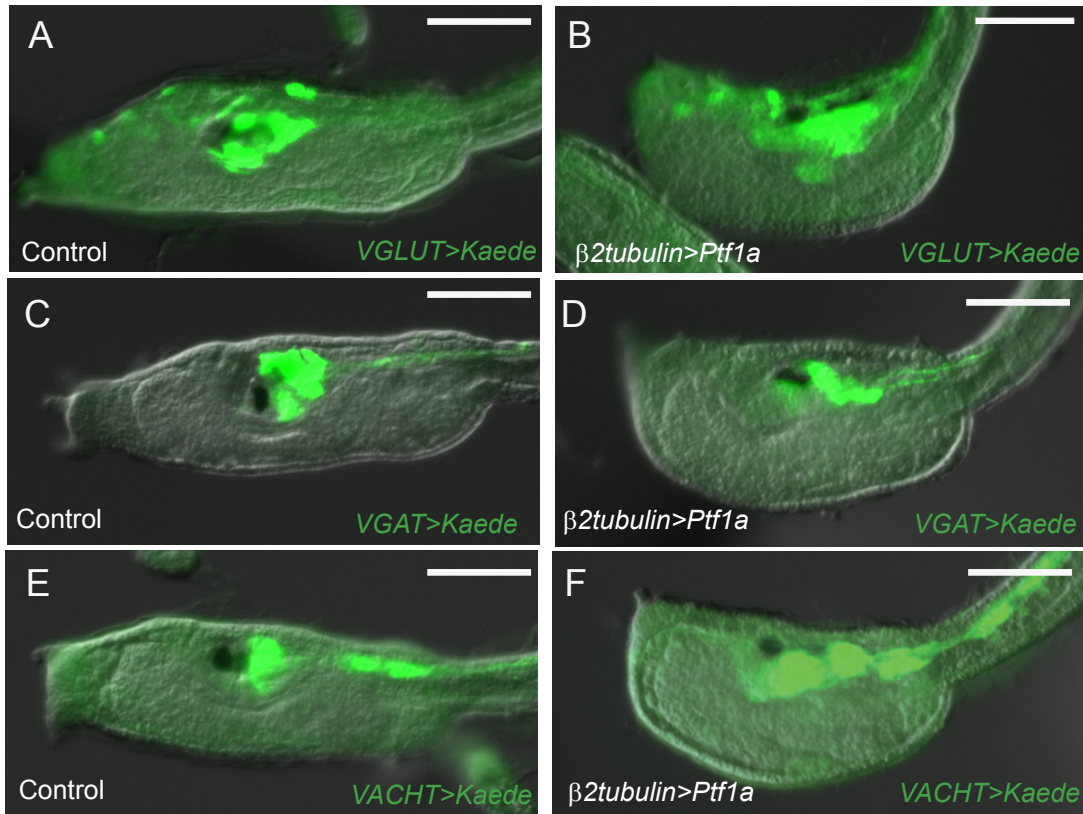

Supplement: supp_gad.317669.118_Supplemental_Fig_S8.pdf [file supp_gad.317669.118_Supplemental_Fig_S8.pdf]

Horie\_Supplemental Figure S9

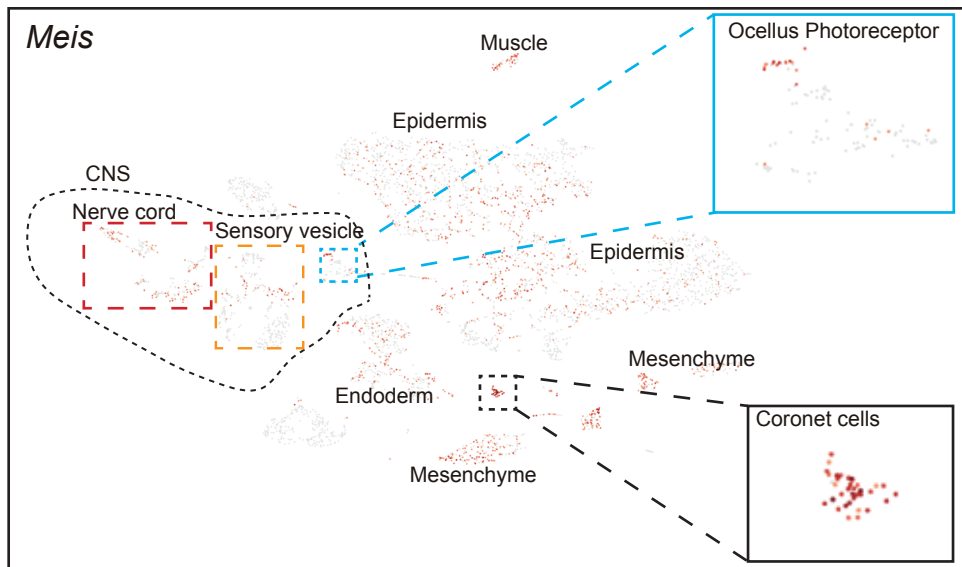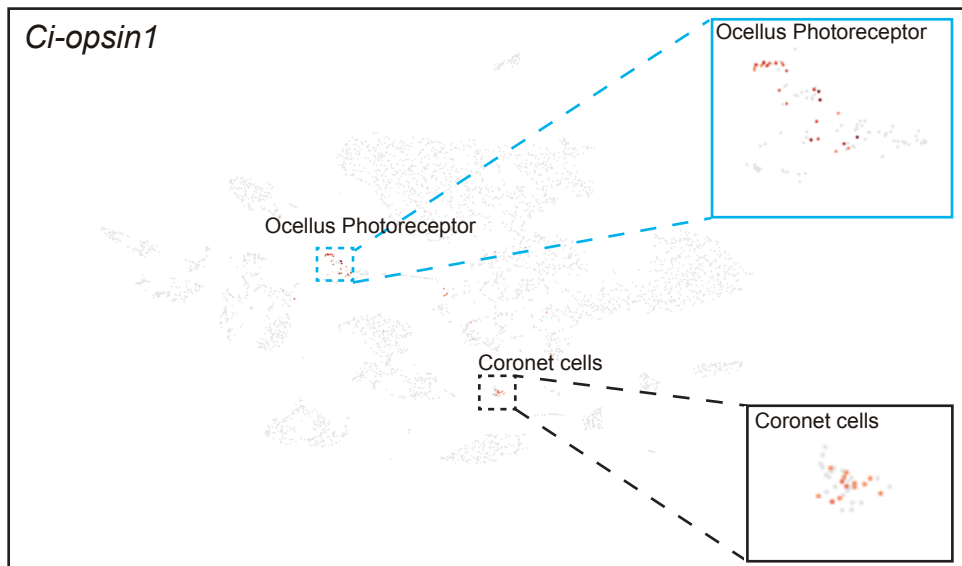

Supplement: supp_gad.317669.118_Supplemental_Fig_S9.pdf [file supp_gad.317669.118_Supplemental_Fig_S9.pdf]
